# Supplementary material for: Patterns and rates of soil movement and shallow failures across several small watersheds on the Seward Peninsula, Alaska
Source: Copernicus journal article supplement (doi:10.5194/esurf-2022-43), 2022-09-09
Supplement: Supplementary file 1 [file esurf-2022-43-supplement.pdf]

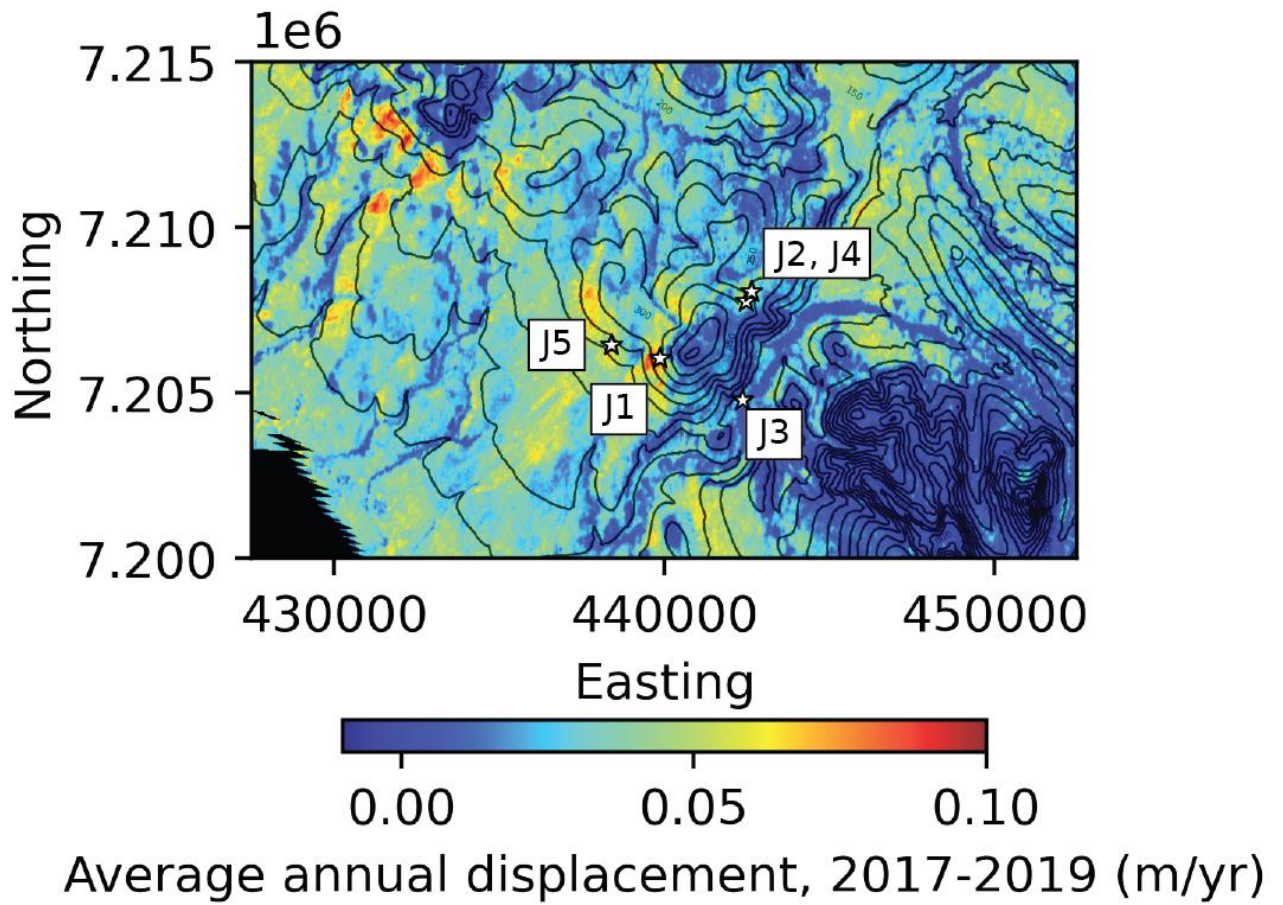

1

2 Fig. S1: InSAR average displacements with hillslope site locations noted. Contours are metres

3 above sea level every 50 m.

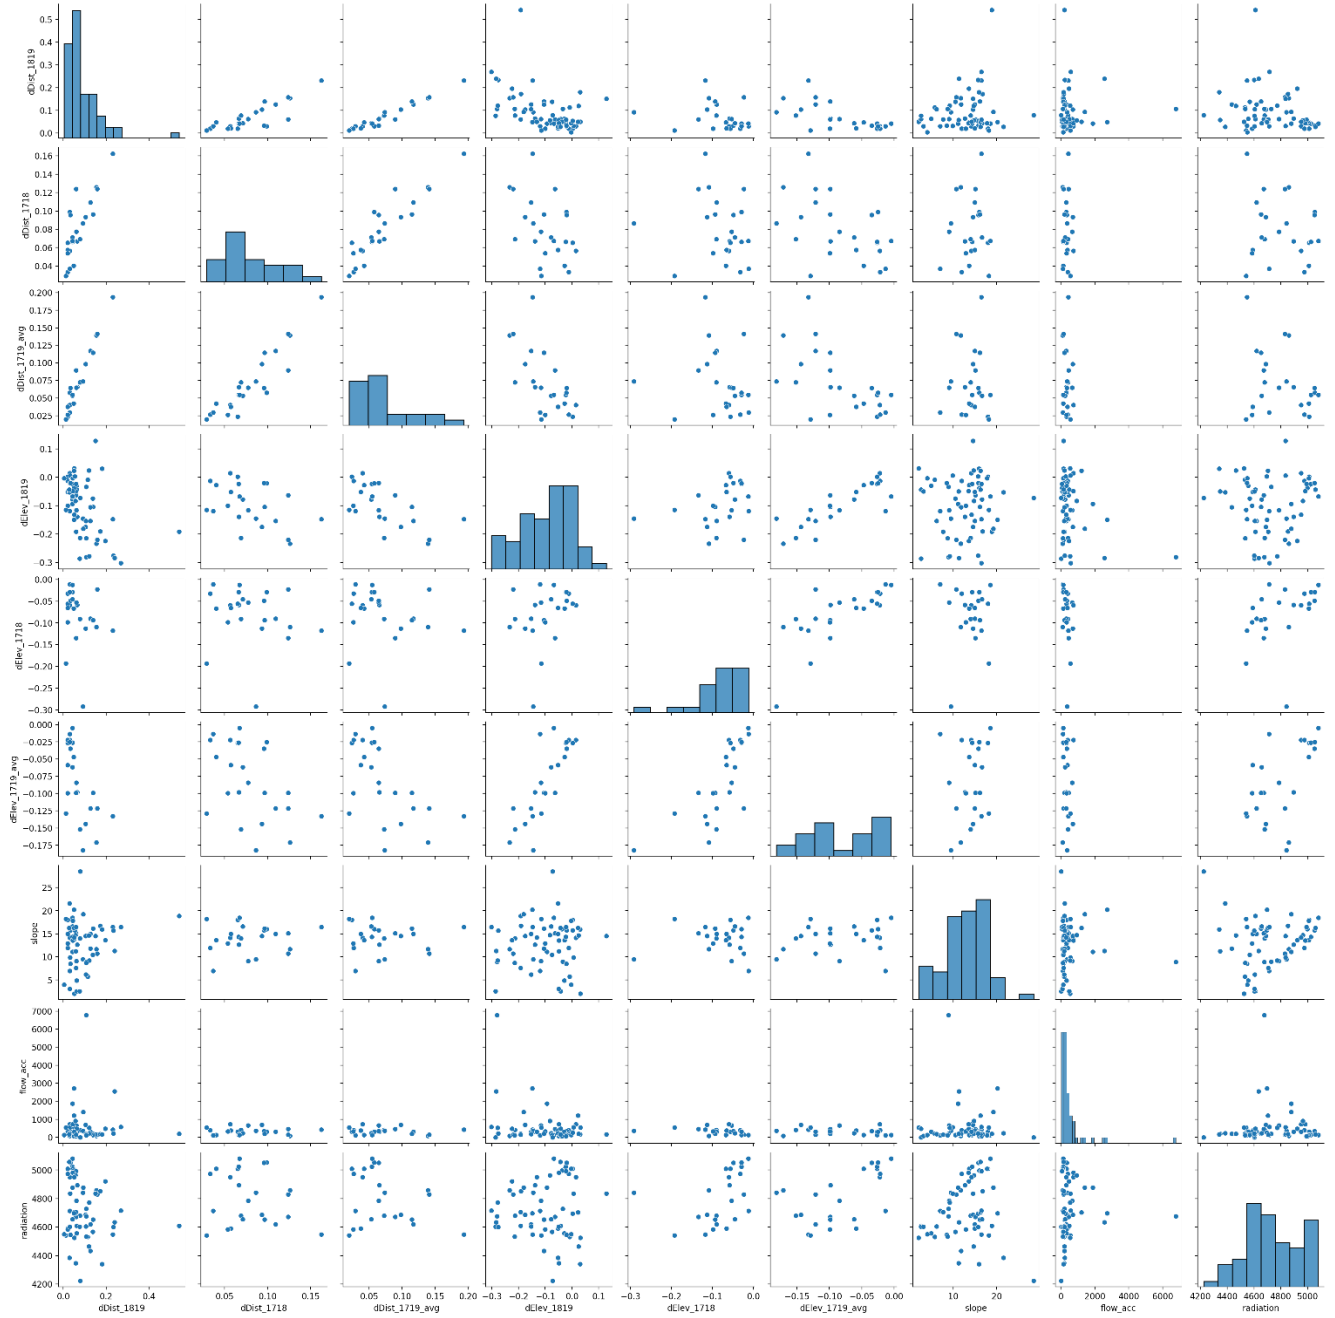

4

5 Figure S2: Pairplot of relationship between yearly vertical and horizontal DGPS-derived  
 6 displacements as well as terrain attributes as described in the text. “dElev” denotes change in  
 7 elevation, “dDist” denotes change in distance.
